# Supplementary material
Source: ML conference proceedings conference paper supplement (https://openreview.net/forum?id=shzu8d6_YAR)
Supplement: supplementary_material [file attachment]

# Installation Guide for AI Fairness 360 Toolkit

## Introduction

We will describe how to install AI Fairness 360 toolkit (AIF360) in a standard machine running a Windows, Linux, MacOS operating systems. This guide is created for the audience at the tutorial at ACM FAT\* Conference 2019. The audience are requested to sign up to the slack channel since a lot of discussion is expected to happen there. Remote support is also provided through the channel.

Additional help can be obtained from the following places:

1. Tutorial website: [https://github.com/IBM/AIF360/wiki/ACM-FAT\\*2019-Tutorial](https://github.com/IBM/AIF360/wiki/ACM-FAT*2019-Tutorial)
2. AIF360 landing page: <http://aif360.mybluemix.net>
3. AIF360 Github page: <https://github.com/ibm/aif360>
4. Slack workspace: <https://aif360.slack.com/> (request invitation here: [https://join.slack.com/t/aif360/shared\\_invite/enQtNDI5Nzg2NTk0MTMyLTU4N2UwODVmMTYxZWZmZmZkODdjMTk5NWUwZDNhNDhlMzNkZDNhOTYwZDNIODc1MTdjYzY5OTU2OWQ1ZmY](https://join.slack.com/t/aif360/shared_invite/enQtNDI5Nzg2NTk0MTMyLTU4N2UwODVmMTYxZWZmZmZkODdjMTk5NWUwZDNhNDhlMzNkZDNhOTYwZDNIODc1MTdjYzY5OTU2OWQ1ZmY)). Please join the *#fat-tutorial-2019* channel (<https://aif360.slack.com/messages/CFDG99ER3>), where all discussions will happen during the tutorial.
5. One of the instructors

All commands and console messages will be given in `Luci da Console` font.

## Requirements

1. Python 3.5 [Anaconda or Pure Python]
  - a. Anaconda distribution can be downloaded from <https://www.anaconda.com/download/>  
Anaconda is the recommended base distribution to use AIF360 and it is likely the easiest way to install AIF360.
  - b. Pure python can be downloaded from <https://www.python.org/downloads/>  
Pure python is not recommended, but instructions are given for expert users.
2. Access to command prompt/terminal (no GUI install available).

## Initial Verification:

1. Check if you have python installed by typing `python` in command prompt/terminal. If this is not installed install it. In Windows, command prompt will not work, you have to use *Anaconda Prompt* for working with Anaconda throughout the tutorial.
2. If the header message says Anaconda skip to *Installation with Anaconda*. If not there are 2 choices:
  - a. Install Anaconda using the instructions above [recommended].
  - b. Continue to instructions in *Installation with Pure Python*.

3. In case you want to try the *Optimized Pre-processing* yourself install the `cvxpy` package. The instructions are available in *Installing CVXPY* section. Note that this is non-trivial for Windows and Linux platforms due to complicated dependencies.

## Installation with Anaconda

1. Create and activate environment:

```
conda create --name ai f360 python=3. 5. 6
conda activate ai f360
```

The shell should not look like `(ai f360) $`

To exit this environment and deactivate the shell use

```
conda deactivate
```

Do not deactivate until you completed doing experiments with AIF360. The advantage in using environments is that you can fully remove the environment if something goes wrong with the installation (`conda env remove --name ai f360`)

2. Install AIF360

```
pip install ai f360
```

should install the latest stable version.

3. Download `tutorial_files.zip` from the *#fat-tutorial-2019* slack channel to the `Downloads` folder and unzip it in place. Change to `tutorial_files` directory.

Windows:

```
cd C:\Users\%USERNAME%\Downloads\tutorial_files
```

Linux and MacOS:

```
cd ~/Downloads/tutorial_files
```

4. Run the script `copy_datasets.py` in the `Downloads` folder to copy the datasets to the correct location in the AIF360 toolbox.

```
python copy_datasets.py
```

**NOTE:** By running this script, you acknowledge the responsibility for reading and abiding by any copyright/usage rules and restrictions as stated on the corresponding links.

- Adult / Census Income  
<https://archive.ics.uci.edu/ml/datasets/adult>
- German Credit Data  
<https://archive.ics.uci.edu/ml/datasets/Statlog+%28German+Credit+Data%29>

- ProPublica Recidivism/COMPAS  
<https://github.com/propublica/compas-analysis>
  - Medical Expenditure Panel Survey (MEPS)  
[https://meps.ahrq.gov/data\\_stats/data\\_use.jsp](https://meps.ahrq.gov/data_stats/data_use.jsp)
5. Take Download examples from <https://github.com/IBM/AIF360/tree/master/examples> to `tutorial_files/examples` folder. The easiest way to do this is to download the entire repository <https://github.com/IBM/AIF360/archive/master.zip> and copy the `examples` folder from there.
  6. Download UTK dataset Face dataset from <https://susanqq.github.io/UTKFace/>
    - Choose Aligned&cropped option and download the UTKFace.tar.gz file.
  7. Install additional packages  

```
pip install --upgrade numpy
pip install -r requirements.txt
```
  8. Install PyTorch (for running gender classification tutorial)  
Download page: <https://pytorch.org>

Windows: `conda install pytorch-cpu torchvision-cpu -c pytorch`

Linux: `conda install pytorch-cpu torchvision-cpu -c pytorch`

MacOS: `conda install pytorch torchvision -c pytorch`

Install torchsummary:

```
pip install torchsummary
```

## Installation with Pure Python

1. Download and install Python 3.5.4  
Download page: <https://www.python.org/downloads/release/python-354/>  
Windows: <https://www.python.org/ftp/python/3.5.4/python-3.5.4-amd64.exe>  
Linux: Manual install only, see download page  
MacOS: <https://www.python.org/ftp/python/3.5.4/python-3.5.4-macosx10.6.pkg>
2. Create virtual environment:

Use `virtualenv` to create a virtual environment. Syntax for this command is:

```
virtualenv --python=<<full path to python3.5.4 executable binary>>
<<virtual environment folder>>
```

In MacOS for example, this command may work.

```
virtualenv -
python=/Library/Frameworks/Python.framework/Versions/3.5/bin/python3
~/AIF360
```

3. Activate the virtual environment:

In MacOS for example, this command may work.  
`source ~/.aif360/bin/activate`

The prompt should start with `(.aif360)`

Deactivation can be just done using `deactivate` command. Do not deactivate until you completed doing experiments with AIF360. Removing the environment can be done by deleting the entire `~/.aif360` directory.

4. Perform steps 2-6 under *Installation with Anaconda*
5. Install PyTorch (for running gender classification tutorial)

Download page: <https://pytorch.org>

Windows:

```
pip3 install https://download.pytorch.org/whl/cpu/torch-1.0.0-cp35-cp35m-win_amd64.whl
```

```
pip3 install torchvision
```

Linux:

```
pip3 install https://download.pytorch.org/whl/cpu/torch-1.0.0-cp35-cp35m-linux_x86_64.whl
```

```
pip3 install torchvision
```

MacOS:

```
pip3 install torch torchvision
```

## Installing CVXPY [Optional and Non-Trivial]

Windows only<sup>1</sup>: This step needs to be done to install the CVXPY package. If you do not want this package, you can skip this step and go to step c. **RUNNING THIS STEP WILL DOWNLOAD AND INSTALL ABOUT 5GB WORTH OF SOFTWARE.**

- Go to: <https://www.visualstudio.com/downloads/#build-tools-for-visual-studio-2017>
- Select free download under Visual Studio Community 2017
- Run the installer.
- Under workload tab:
  - i. Under *Windows* there are 3 choices, select *Desktop development with C++ only*.
  - ii. Under *Web & Cloud* there are 7 choices, select *Python development only*

---

<sup>1</sup> Courtesy: <https://stackoverflow.com/questions/48541801/microsoft-visual-c-14-0-is-required-get-it-with-microsoft-visual-c-build-t>

- Proceed and finish installation.
- Install CVXPY.  
`pip install numpy==1.8`  
`pip install cvxpy`

Linux:

```
pip install numpy==1.8
pip install cvxpy
```

MacOS: You may have to install XCode tools using `xcode-select --install` for this to work.

```
pip install numpy==1.8
pip install cvxpy
```

That's all Folks!
